# Supplementary material
Source: publisher figshare collection journal article supplement (https://sage.figshare.com/ndownloader/files/16107152)
Supplement: Supplementary file 1 [file 16107152]

## Appendix I

The success probability of the first hop can be calculated by

$$P_{SUC_{R_i U_i}} \square P \left( \frac{\rho_{R_i} \Upsilon_{R_i U_i}^{-\alpha} |H_{R_i U_i}|^2}{I_{U_i}} \geq \theta_{U_i} \right) \quad (20)$$

$$P_{SUC_{R_i U_i}} \square P \left( |H_{R_i U_i}|^2 \geq \theta_{U_i} \rho_{R_i}^{-1} \Upsilon_{R_i U_i}^{\alpha} I_{U_i} \right) \quad (20-a)$$

where  $I_{U_i}$  is defined in Eq. (3) as the overall interference received at  $U_i$  and written as

$$I_{U_i} \cong \sum_{\{i, j\} \in \phi} \left( \rho_{R_j} \Upsilon_{R_j U_i}^{-\alpha} |H_{R_j U_i}|^2 \right) + \left( \rho_{R_j} \rho_{R_i} \Upsilon_{R_j R_i U_i}^{-\alpha} |H_{R_j R_i U_i}|^2 \right) \quad (20-b)$$

Let us define  $f_{I_{U_i}}(t) = dP(I_{U_i} \leq t)$  as the PDF of  $I_{U_i}$ . The integration of  $f_{I_{U_i}}(t)$  using the CCDF  $F_{I_{U_i}}^c(t)$ , transforms it as

$$\nabla(s)_{U_i} \square \int_0^{\infty} F_{RU}^c(st) \square f_{I_{U_i}}(t) dt \quad (20-c)$$

Note that the power of desired signal is distributed as  $|H_{R_i U_i}|^2 \square X_{i N_R}^2$ , and the probability of success given is by

$$P_{SUC_{R_i U_i}} \square P(SINR_{U_i} \geq \theta_{U_i}) \square P \left( |H_{R_i U_i}|^2 \geq \theta_{U_i} \rho_{R_i}^{-1} \Upsilon_{R_i U_i}^{\alpha} I_{U_i} \right) \quad (20-d)$$

$$\square \int_0^{\infty} F_{RU}^c(st) \square f_{I_{U_i}}(t) dt \quad (20-e)$$

$$= \nabla(s) \Big|_{s=\theta_{U_i} \rho_{R_i}^{-1} \Upsilon_{R_i U_i}^{\alpha}} \quad (20-f)$$

Finally, using the CCDF  $F_{RU}^c(st) = e^{-t}$  and laplace transform, the success probability can be expressed using the transformation of  $f_{I_{U_i}}(t)$  as

$$\nabla(s)_{U_i} \square \int_0^{\infty} F_{RU}^c(st) \square f_{I_{U_i}}(t) dt \quad (21)$$

$$\lambda\{f_{1U_i}(t)\}(s) = \lambda_{1U_i} \quad (21-a)$$

Finally, using the CCDF  $F_{RU}^C(t) = \prod_n e^{-nt} \prod_i e^{a_n t^i}$  the transformation of  $f_{1U_i}(t)$  is given by

$$\nabla(s)_{U_i} \square \int_0^\infty F_{RU}^C(st) \square f_{1U_i}(t) dt \quad (21-b)$$

$$\nabla(s) \square \int_0^\infty \left( \prod_n e^{-nst} \prod_i e^{a_n (st)^i} \right) \cdot f_{1U_i}(t) dt \quad (21-c)$$

$$\nabla(s) \square \prod_n \prod_i a_n s t^i \left[ \int_0^\infty (e^{-nt} t^i f_{1U_i}(t) dt) \right] \quad (21-e)$$

$$\nabla(s) \square \prod_n \prod_i a_n s^i \left[ \lambda(t^i f_{1U_i}(t))(ns) \right] \quad (21-f)$$

$$\nabla(s) \square \prod_n \prod_i \left[ a_n (-s)^i \frac{d^i}{d(ns)^i} \lambda_{1U_i}(ns) \right] \quad (21-g)$$

$$\nabla(s) \square \prod_n \prod_i \left[ a_n \left( \frac{-s}{n} \right)^i \frac{d^i}{d(ns)^i} \lambda_{1U_i}(ns) \right] \quad (22)$$

where Eq. (21-g) is obtained by using Laplace transform property  $t^n f(t) \leftrightarrow (-1)^n \frac{d^n}{ds^n} \lambda[f(t)]_s$ . Using the moment-generating function of  $X_{i N_R}^j$  and Gamma distributions, and applying it to [62] (Thr. 1)] we can get Eq. (10)

## Appendix II

Building on [62] (Thr. 3)], we have  $\nu(s)$  in Eq. (11) is bounded as  $\nu(s) \in [\nu^{\max}(s), \nu^{\min}(s)]$ , where  $\nu^{\max}(s)$  and  $\nu^{\min}(s)$  are defined in Eq. (15) and Eq. (16), respectively. Then, the lower and upper bounds on  $\lambda_{1U_i}(s)$  in Eq. (13) and Eq. (14) readily follow.

## Appendix III

The success probability of the RU hop is calculated as

$$P_{SUC_{R_i U_i}} \square P(SINR_{U_i} \geq \theta_{U_i}) \quad (23)$$

$$P_{SUC_{R_i U_i}} \square P\left(\frac{\rho_{R_i} \Upsilon_{R_i U_i}^{-\alpha} |H_{R_i U_i}|^2}{I_{U_i}} \geq \theta_{U_i}\right) \quad (23-a)$$

$$P_{SUC_{R_i U_i}} \square P\left(|H_{R_i U_i}|^2 \geq \theta_{U_i} \rho_{R_i}^{-1} \Upsilon_{R_i U_i}^{\alpha} I_{U_i}\right) \quad (23-b)$$

where  $I_{U_i}$  is defined in Eq. (3) as,

$$I_{U_i} \cong \sum_{\{i,j\} \in \phi} \left( \rho_{R_j} \Upsilon_{R_j U_i}^{-\alpha} |H_{R_j U_i}|^2 \right) + \left( \rho_{R_j} \rho_{R_i} \Upsilon_{R_j R_i U_i}^{-\alpha} |H_{R_j R_i U_i}|^2 \right) \quad (23-c)$$

The desired signal is distributed as  $|H_{R_i U_i}|^2 \square X_{i N_R}^j$ . On the other hand, the moment generating function of

$X_{i N_R}^j$  distribution can provide the Laplace transform of  $I_{U_i}$  [69] (P. 125) and can be computed as

$$\lambda_{I_{U_i}}(s) \square \xi \left( \prod_{\{i,j\} \in \phi} \xi \left\{ \exp \left( -s \frac{\rho_{R_i} \Upsilon_{R_i U_i}^{-\alpha} |H_{R_i U_i}|^2}{N_R} \right) \right\} \right) \quad (23-d)$$

## Appendix IV

Given the definition of  $\mathcal{G}(s, r)$

$$\psi(s, D_{RD}) \in \left[ \frac{1}{1 + s \rho_{R_i} (r + \Gamma_{RU})^{-\gamma}}, \frac{1}{1 + s \rho_{R_i} (r - \Gamma_{RU})^{-\gamma}} \right] \quad (24)$$

where  $r$  is the origin point of relay and  $\Gamma_{RU}$  is the distance between RN and user. We can recall that distances between  $R_i$  to  $U_i$ , then the maximum and minimum  $\lambda_{I_{U_i}}$  can be formulated as stated in Eq. (13) and Eq. (14).
